# Supplementary material
Source: Research Square preprint supplement (doi:10.21203/rs.3.rs-6745156/v1)
Supplement: Supplementary file 1 [file de315a92b1237b2dbe992883.docx]

**Additional file 1.** Questionnaire

**Socio-demographic variables**

1. SEX

- Male
- Female
- I prefer not to say

2. AGE

_______________________________

3. UNIVERSITY

- IE University
- Distance University of Madrid
- Alfonso X El Sabio University
- Antonio de Nebrija University
- Autonomous University of Barcelona
- Autonomous University of Madrid
- Camilo José Cela University
- Cardenal Herrera University - CEU
- Carlos III University of Madrid
- Catholic University of Avila
- Catholic University of Valencia S. Vicente M.
- San Antonio Catholic University of Murcia
- Complutense University of Madrid
- University of A Coruña
- University of Alcalá
- University of Alicante
- University of Almeria
- University of Barcelona
- University of Burgos
- University of Cádiz
- University of Cantabria
- University of Castilla-La Mancha
- University of Cordoba
- University of Deusto
- University of Extremadura
- University of Girona
- University of Granada
- University of Huelva
- University of Jaén
- University of La Laguna
- University of La Rioja
- University of Las Palmas de Gran Canaria
- University of León
- University of Málaga
- University of Murcia
- University of Navarra
- University of Oviedo
- University of Salamanca
- University of Santiago de Compostela
- University of Seville
- University of Valladolid
- University of Vic
- University of Zaragoza
- University of the Basque Country
- European University of Madrid
- European University Miguel de Cervantes
- Fernando III University
- Francisco de Vitoria University
- International University of Andalusia
- International University of Catalonia
- International University of La Rioja
- Menéndez Pelayo International University UIMP
- Miguel Hernández University of Elche
- Mondragon Unibertsitatea University
- National University of Distance Education U.N.E.D.
- Pablo de Olavide University
- Polytechnic University of Cartagena
- Polytechnic University of Catalonia
- Polytechnic University of Madrid
- Polytechnic University of Valencia
- Pompeu Fabra University
- Comillas Pontifical University
- Pontifical University of Salamanca
- Public University of Navarra
- Ramón Llull University
- King Juan Carlos University
- Rovira i Virgili University
- San Jorge University
- San Pablo C.E.U. University
- University of Vigo
- Abat Oliba CEU University
- University of the Balearic Islands
- University of Lleida
- University of Valencia
- Jaume I University of Castellón
- Open University of Catalonia
- International University of Valencia (VIU)

5. DEGREE IN WHICH YOU ARE ENROLLED

_______________________________

6. YEAR IN WHICH YOU ARE ENROLLED

- 1ST
- 2ND
- 3RD
- 4TH
- 5TH
- 6TH

7. YOUR USUAL RESIDENCE IS IN A RURAL ENVIRONMENT (LESS THAN 25,000 INHABITANTS)

- Rural (less than 25,000 inhabitants)
- Urban (more than 25,000 inhabitants)

8. DURING THE ACADEMIC YEAR, WHERE DO YOU LIVE MOST OF THE TIME?

Family home

Shared flat

Student residence

Other: _______________________________

9. DO YOU WORK?

- Yes, part-time
- Yes, full time
- No

10. PARENTS' LEVEL OF EDUCATION

|  | No education | Primary | Secondary | Vocational education | University studies |
| --- | --- | --- | --- | --- | --- |
| Madre |  |  |  |  |  |
| Padre |  |  |  |  |  |

11. APPROXIMATELY HOW MUCH DO YOU WEIGH?

_______________________________

12. APPROXIMATELY HOW TALL ARE YOU?

_______________________________

13. WOULD YOU SAY YOUR HEALTH IS:

Excellent

Good

Fair

Poor

14. ON A SCALE OF 0 TO 10, WHERE 0 IS THE WORST HEALTH AND 10 IS THE HIGHEST, WOULD YOU CONSIDER YOUR HEALTH TO BE AT:

1 2 3 4 5 6 7 8 9 10

**Life skills**

15. SELF-EFFICIENCY

Baessler and Schwarzer's General Self-Efficacy Scale

Rate each of the questions from 1 to 4 according to the following indications: 1 / Incorrect, 2 / Barely true, 3 / Mostly true, 4 / True.

1. I can find a way to get what I want, even if someone opposes me. 2.
2. I can solve difficult problems if I try hard enough
3. It is easy for me to persist in what I have set out to do until I reach my goals.
4. I am confident that I can handle unexpected events effectively.
5. I am able to overcome unexpected situations because of my qualities and resources.
6. When I find myself in difficulties I can remain calm because I have the necessary skills to handle difficult situations.
7. Whatever comes my way, I am usually able to handle it.
8. I can solve most problems if I put in the necessary effort.
9. If I find myself in a difficult situation, I can usually figure out what to do.
10. When faced with a problem, I can usually think of several alternatives of how to solve it.

16. SOCIAL SKILLS

Social Skills Assessment Checklist (Goldstein et. al. 1980) (Early Social Skills and Advanced Social Skills)

Rate each of the questions from 1 to 5 on how well you use the skill according to the following indications: 1: never, 2: very rarely, 3: some of the time, 4: often, 5: always.

1. Do you pay attention to the person who is speaking to you and make an effort to understand what they are saying to you?
2. Do you start a conversation with other people and then can you keep it going for a while?
3. Do you talk to other people about things that interest you both?
4. Do you choose the information you need to know and ask the right person for it?
5. Do you tell others that you are grateful to them for something they have done for you?
6. Do you make an effort to meet new people on your own initiative?
7. Do you introduce new people to others?
8. Do you tell others what you like about them or what they do?
9. Do you ask for help when you need it?
10. Do you join a group to participate in a certain activity?
11. Do you clearly explain to others how to do a specific task?
12. Do you pay attention to instructions, ask for explanations and carry out instructions correctly?
13. Do you apologize to others when you have done something you know is wrong?
14. Do you try to persuade others that your ideas are better and will be more useful than those of other people?

17. SKILLS RELATED TO AFFECT MANAGEMENT

Affective Balance Scale

Rate each of the questions from 1 to 3 according to the following indications: 1: little or never, 2: sometimes, 3: usually or a lot.

1. Have you ever felt annoyed by someone?
2. Have you ever felt very lonely or distant from people?
3. Have you felt that things were going the way you wanted them to go?
4. Did you feel very worried?
5. Have you ever felt happy to have good friends?
6. Have you been afraid of what might happen?
7. Have you felt particularly stimulated or interested in anything?
8. Have you ever felt depressed or very unhappy?
9. Have you felt full of energy?
10. Did you feel very tired?
11. Did you feel very nervous, overwhelmed or tense?
12. Did you feel like you were having a lot of fun?
13. Did you feel very cheerful or happy?
14. Did you feel like crying?
15. Did you feel euphoric (very happy or joyful)?
16. Did you feel confident about the future?
17. Did you feel bored?
18. Did you feel happy or satisfied for having achieved something?

**Habits**

18. FOOD

1. How often do you usually eat breakfast on days when you have to go to school?

- I never eat breakfast during the week
- One day
- Two days
- Three days
- Four days
- Five days

2. How many times a week do you usually eat or drink...? Please fill in one box per row

|  | Never | Less than once a week | Once a week | 2-4 times per week | 5-6 times per week | Once a day, every day | Every day, more tan once |
| --- | --- | --- | --- | --- | --- | --- | --- |
| Fruit |  |  |  |  |  |  |  |
| French fries or salty snacks |  |  |  |  |  |  |  |
| Vegetables |  |  |  |  |  |  |  |
| Sweets |  |  |  |  |  |  |  |
| Soft drinks or other sugary beverages |  |  |  |  |  |  |  |
| Meat |  |  |  |  |  |  |  |
| Fish |  |  |  |  |  |  |  |
| Milk or dairy products (yoghurt, cheese...) |  |  |  |  |  |  |  |
| Cereals (bread, pasta, rice...) |  |  |  |  |  |  |  |

19. SLEEP

1. How many hours do you usually sleep at night during the week?

- Less than 5 hours
- Between 5-7 hours
- Between 7-9 hours
- More than 9 hours

20. PHYSICAL ACTIVITY

1. How often do you engage in any physical activity in your free time that causes you to break a sweat or become short of breath?

- Every day
- 4 to 6 times a week
- 2 to 3 times a week
- Once a week
- Once a month
- Less than once a month
- Not at all

2. How many hours a week do you usually engage in any physical activity that causes you to become sweaty or short of breath during your free time?

- None
- Approximately half an hour
- Approximately one hour
- Approximately 2 to 3 hours
- From 4 to 6 hours
- More than 6 hours

3. Which of the following types of activities do you usually do in your free time? Check one box for each line

|  | I do not do this activity | 2-3 times a month or rarely | Approximately once a week | 2 or more times a week |
| --- | --- | --- | --- | --- |
| Team physical activities (soccer, basketball...) |  |  |  |  |
| Individual physical activities (swimming, athletics, cycling...) |  |  |  |  |

4. How do you usually go to college (if you have to go)?

- On foot
- By bicycle
- By car
- By bus

21. SCREENS

1. How many hours a day, in your free time, do you usually spend playing games on your computer, video game console, Tablet, Smartphone or other electronic device (not including motion games or physical exercise)?

| Weekdays | Weekend days |
| --- | --- |
| - None - Half an hour to an hour a day - One to two hours per day - 3 to 5 hours per day - 5 to 7 hours per day - More than 7 hours a day | - None - Half an hour to an hour a day - One to two hours per day - 3 to 5 hours per day - 5 to 7 hours per day - More than 7 hours a day |

2 How many hours a day do you usually spend watching TV, videos (youtube or similar), movies, series and other entertainment on a screen?

| Weekdays | Weekend days |
| --- | --- |
| - None - Half an hour to an hour a day - One to two hours per day - 3 to 5 hours per day - 5 to 7 hours per day - More than 7 hours a day | - None - Half an hour to an hour a day - One to two hours per day - 3 to 5 hours per day - 5 to 7 hours per day - More than 7 hours a day |

3. How many hours a day, in your free time, do you usually spend using electronic devices such as computers, tablets or smartphones to do homework, work, surf the Internet or social networks (Facebook, twitter, snapchat...)? (discrete quantitative variable)

| Weekdays | Weekend days |
| --- | --- |
| - None - Half an hour to an hour a day - One to two hours per day - 3 to 5 hours per day - 5 to 7 hours per day - More than 7 hours a day | - None - Half an hour to an hour a day - One to two hours per day - 3 to 5 hours per day - 5 to 7 hours per day - More than 7 hours a day |

22. CONSUMPTION OF INTOXICANTS

1. How often do you currently smoke tobacco?

- Every day
- At least once a week, but not every day
- Less than once a week
- I do not smoke

2. How often do you drink any alcohol? Count even those times when you drink only a small quantity

|  | Every day | Every week | Every months | Rarely | Never |
| --- | --- | --- | --- | --- | --- |
| Wine and/or beer |  |  |  |  |  |
| Liqueurs (gin, rum, whiskey) drunk neat or with a soft drink (cubata) |  |  |  |  |  |
| Liqueurs in the form of shot glasses |  |  |  |  |  |
| Any other beverage containing alcohol |  |  |  |  |  |

3. Have you ever taken one or more of these drugs in your life?

|  | Never | 1-2 times | 3-5 times | 6-9 times | 10-19 times | 20-29 times | 30 times or more |
| --- | --- | --- | --- | --- | --- | --- | --- |
| Cocaine |  |  |  |  |  |  |  |
| Hashish or marijuana (joints) |  |  |  |  |  |  |  |
| Ecstasy, pills, MDMA... |  |  |  |  |  |  |  |
| Amphetamines or speed |  |  |  |  |  |  |  |
| LSD (acid, tripi, hallucinogens) |  |  |  |  |  |  |  |
| Medications to be placed |  |  |  |  |  |  |  |
| Glue or solvents |  |  |  |  |  |  |  |
| Popper |  |  |  |  |  |  |  |
| Other drugs  ¿Which?______ |  |  |  |  |  |  |  |

4. At what age did you first do the following things?

|  | Never | 10 years or less | 12 years | 13 years | 14 years o more |
| --- | --- | --- | --- | --- | --- |
| Drinking alcohol (more than just tasting it or having a drink) |  |  |  |  |  |
| Get drunk |  |  |  |  |  |
| Smoking a cigarette (more than one puff) |  |  |  |  |  |
| Cannabis use |  |  |  |  |  |
| Other drugs. Indicate which ones |  |  |  |  |  |

23. ACADEMIC PERFORMANCE

- Cut-off score in the University Entrance Examination
- Number of credits enrolled
- Number of credits passed
- Overall average grade
